# Supplementary material for: Relationship between Lipoprotein (a) and cognitive function – Results from the Berlin Aging Study II
Source: PubMed Central journal article supplement (PMC7326928; doi:10.1038/s41598-020-66783-3), 2020-06-30
Supplement: 41598_2020_66783_MOESM1_ESM.pdf [file 41598_2020_66783_MOESM1_ESM.pdf]

## **Supplementary Tables**

### **Relationship between Lipoprotein (a) and cognitive function – Results from the Berlin Aging Study II**

Franziska Röhr, Nina Bucholtz, Sarah Töpfer, Kristina Norman, Dominik Spira, Elisabeth Steinhagen-Thiessen, Christina M. Lill, Lars Bertram, Ilja Demuth, Nikolaus Buchmann and Sandra Düzel

**Supplementary Table 1:** Characteristics of the BASE-II study population according to Lp(a) in men

| Men (n=659)                              |                     |                  |         |
|------------------------------------------|---------------------|------------------|---------|
|                                          | Lp(a) quintiles 2-5 | Lp(a) quintile1  | p-value |
| Age [years]                              | 68 ± 4              | 68 ± 4           | n.s.    |
| Weight [kg]                              | 83.41 ± 11.81       | 85.86 ± 13.65    | n.s.    |
| Height [cm]                              | 175.59 ± 6.41       | 175.41 ± 5.45    | n.s.    |
| BMI [kg/m <sup>2</sup> ]                 | 27.05 ± 3.51        | 27.88 ± 4.06     | 0.046   |
| Regular alcohol intake                   | 464 (90.4)          | 143 (93.1)       | n.s.    |
| Current smoking                          | 57 (11.1)           | 16 (11.1)        | n.s.    |
| Physically inactive                      | 48 (9.4)            | 25 (17.4)        | n.s.    |
| GDS- score                               | 24.61 ± 1.05        | 24.61 ± 1.01     | n.s.    |
| <b>Cognitive function</b>                |                     |                  |         |
| Verbal memory                            | -0.2133 ± 0.9781    | -0.0644 ± 0.7825 | n.s.    |
| Visuo-construction                       | 0.1364 ± 0.9799     | 0.1802 ± 0.8831  | n.s.    |
| Executive functions and processing speed | 0.0852 ± 0.9898     | -0.0728 ± 0.7425 | n.s.    |
| Verbal fluency                           | -0.0881 ± 0.7612    | -0.1490 ± 0.6363 | n.s.    |
| <b>Lipid profile</b>                     |                     |                  |         |
| Total Cholesterol [mg/dl]                | 204 ± 38            | 197 ± 35         | 0.027   |
| HDL- C [mg/dL]                           | 56 ± 14             | 53 ± 14          | 0.023   |
| LDL - C [mg/dL]                          | 125 ± 35            | 118 ± 31         | 0.023   |
| TG [mg/dL]                               | 119 ± 75            | 132 ± 82         | 0.017   |
| Lp(a) [mg/L]                             | 290.9 ± 339.3       | 15.3 ± 2.2       | < 0.001 |
| <b>APOE genotype</b>                     |                     |                  |         |
| 22                                       | 2 (0.4)             | 3 (2.1)          | n.s.    |
| 23                                       | 61 (11.9)           | 28 (19.3)        | n.s.    |
| 24                                       | 11 (2.1)            | 4 (2.8)          | n.s.    |
| 33                                       | 317 (61.7)          | 77 (53.1)        | n.s.    |
| 34                                       | 115 (22.4)          | 31 (21.4)        | n.s.    |
| 44                                       | 8 (1.6)             | 2 (1.4)          | n.s.    |
| Vitamin B12 [ng/L]                       | 370.3 ± 214.5       | 377.1 ± 210.8    | n.s.    |

|                              |              |              |      |
|------------------------------|--------------|--------------|------|
| Homocysteine<br>[μmol/L]     | 14.11 ± 3.72 | 14.92 ± 4.79 | n.s. |
| C-reactive protein<br>[mg/L] | 1.7 ± 2.4    | 2 ± 2.5      | n.s. |
| Folic acid [μg/L]            | 11.04 ± 5.64 | 10.28 ± 4.08 | n.s. |
| HbA1c [%]                    | 5.7 ± 0.6    | 5.7 ± 0.6    | n.s. |
| TSH basal [mU/L]             | 1.99 ± 1.72  | 2.48 ± 5.67  | n.s. |
| Sodium [mmol/L]              | 139 ± 3      | 139 ± 3      | n.s. |
| Potassium<br>[mmol/L]        | 4.5 ± 0.4    | 4.5 ± 0.4    | n.s. |
| Magnesium<br>[mmol/L]        | 0.82 ± 0.07  | 0.82 ± 0.07  | n.s. |

BMI = body mass index; GDS = geriatric depression scale; HDL-C = high density lipoprotein cholesterol; LDL-C = low density lipoprotein cholesterol; Lp(a) = lipoprotein(a), APOE= apolipoprotein E; CRP = C-reactive protein; HbA1c =hemoglobin A 1c; TSH = thyroid stimulating hormone

**Supplementary Table 2:** Characteristics of the BASE-II study population according to Lp(a) in women

| Woman (n=721)                             | Lp(a) quintiles 2-5 | Lp(a) quintile 1 | p- value |
|-------------------------------------------|---------------------|------------------|----------|
| Age [years]                               | 68 ± 3              | 67 ± 3           | n.s.     |
| Weight [kg]                               | 69.71 ± 12.5        | 70.05 ± 11.61    | n.s.     |
| Height [cm]                               | 162.95 ± 6.01       | 162.27 ± 6.04    | n.s.     |
| BMI [kg/m <sup>2</sup> ]                  | 26.27 ± 4.66        | 26.64 ± 4.45     | n.s.     |
| Regular alcohol intake                    | 515 (87.3)          | 118 (90.1)       | n.s.     |
| Current smoking                           | 57 (9.7)            | 6 (4.6)          | n.s.     |
| Physically inactive                       | 44 (7.5)            | 12 (9.2)         | n.s.     |
| GDS score                                 | 24.60 ± 1.03        | 24.73 ± 1.11     | n.s.     |
| <b>Cognitive function (factor scores)</b> |                     |                  |          |
| Verbal memory                             | 0.2198 ± 0.8847     | 0.2534 ± 0.8334  | n.s.     |
| Visuo-construction                        | -0.1333 ± 0.9310    | -0.1016 ± 0.9727 | n.s.     |
| Executive functions and processing speed  | -0.0514 ± 0.8571    | -0.1578 ± 0.6541 | n.s.     |
| Verbal fluency                            | 0,1043 ± 0.6975     | 0.0905 ± 0.7485  | n.s.     |
| <b>Lipid profile</b>                      |                     |                  |          |
| Total cholesterol [mg/dL]                 | 227 ± 37            | 222 ± 41         | n.s.     |
| HDL- C [mg/dL]                            | 69 ± 16             | 69 ± 17          | n.s.     |
| LDL- C [mg/dL]                            | 138 ± 35            | 131 ± 38         | 0.049    |
| TG[mg/dL]                                 | 103 ± 47            | 110 ± 65         | n.s.     |
| Lp(a) [mg/L]                              | 320.4 ± 350.8       | 15.3 ± 2.1       | < 0.001  |
| <b>APOE genotypes</b>                     |                     |                  |          |
| 22                                        | 3 (0.5)             | 0 (0)            | n.s.     |
| 23                                        | 86 (14.6)           | 16 (12.2)        | n.s.     |
| 24                                        | 19 (3.2)            | 6 (4.6)          | n.s.     |
| 33                                        | 362 (61.4)          | 79 (60.3)        | n.s.     |
| 34                                        | 110 (18.6)          | 28 (21.4)        | n.s.     |
| 44                                        | 10 (1.7)            | 2 (1.5)          | n.s.     |
| Vitamin B12 [ng/L]                        | 428.9 ± 314.7       | 397.3 ± 169.8    | n.s.     |
| Homocysteine [μmol/L]                     | 12.51 ± 3.45        | 12.4 ± 3.45      | n.s.     |
| C-reactive protein [mg/L]                 | 2.2 ± 3.4           | 2.1 ± 3.4        | n.s.     |
| Folic acid [μg/L]                         | 11.9 ± 5.81         | 12.26 ± 5.6      | n.s.     |
| HbA1c [%]                                 | 5.6 ± 0.5           | 5.6 ± 0.6        | n.s.     |
| TSH basal [mU/L]                          | 2.35 ± 4.59         | 2.03 ± 1.56      | n.s.     |
| Sodium [mmol/L]                           | 140 ± 3             | 140 ± 3          | n.s.     |
| Potassium [mmol/L]                        | 4.5 ± 0.4           | 4.5 ± 0.3        | n.s.     |

|                       |             |             |      |
|-----------------------|-------------|-------------|------|
| Magnesium<br>[mmol/L] | 0.81 ± 0.06 | 0.81 ± 0.09 | n.s. |
|-----------------------|-------------|-------------|------|

BMI = body mass index; GDS = geriatric depression scale; HDL-C = high density lipoprotein cholesterol; LDL-C = low density lipoprotein cholesterol; Lp(a) = lipoprotein(a), APOE = apolipoprotein E; CRP = C-reactive protein; HbA1c = hemoglobin A 1c; TSH = thyroidstimulating hormone

**Supplementary Table 3:** Association between Lp(a) and cognitive domains

| Factor score                             | Men    |       |         |        | Women  |       |         |       |
|------------------------------------------|--------|-------|---------|--------|--------|-------|---------|-------|
|                                          | beta   | SE    | p-value | R2*    | beta   | SE    | p-value | R2*   |
| Verbal memory                            | 0.128  | 0.099 | 0.196   | 0.015  | 0.029  | 0.097 | 0.765   | 0.031 |
| Visuo-construction                       | 0.050  | 0.103 | 0.630   | -0.013 | -0.011 | 0.103 | 0.916   | 0.013 |
| Executive functions and processing speed | -0.217 | 0.098 | 0.027   | 0.050  | -0.110 | 0.089 | 0.215   | 0.039 |
| Verbal fluency                           | -0.052 | 0.079 | 0.511   | -0.010 | 0.044  | 0.078 | 0.571   | 0.007 |

The models were adjusted for: age, weight, height, HbA1c, *APOE* status, regular alcohol intake, current smoking, physical inactivity, GDS score, TSH, homocysteine, CRP, vitamin B12, magnesium, potassium, sodium, folic acid, morbidity index

\*= R<sup>2</sup> corrected, p-values < 0.05 = statistical significant, corrected p-value (Bonferroni) < 0.0125 = statistical significant

**Supplementary Table 4:** Association between Lp(a) with *executive functions and processing speed* according to sex in subjects without *APOE4* genotype

|         | m      |       |       |                 | w      |       |       |                 |
|---------|--------|-------|-------|-----------------|--------|-------|-------|-----------------|
|         | beta   | SE    | p     | R <sup>2*</sup> | beta   | SE    | p     | R <sup>2*</sup> |
| Model 1 | -0.178 | 0.88  | 0.043 | 0.049           | -0.093 | 0.080 | 0.246 | 0.035           |
| Model 2 | -0.202 | 0.092 | 0.029 | 0.056           | -0.087 | 0.084 | 0.301 | 0.040           |
| Model 3 | -0.217 | 0.098 | 0.027 | 0.050           | -0.010 | 0.089 | 0.215 | 0.039           |
| Model 4 | -0.221 | 0.098 | 0.024 | 0.050           | -0.110 | 0.089 | 0.219 | 0.038           |
| Model 5 | -0.217 | 0.098 | 0.027 | 0.048           | -0.124 | 0.088 | 0.159 | 0.054           |
| Model 6 | -0.213 | 0.098 | 0.029 | 0.049           | -0.104 | 0.089 | 0.244 | 0.041           |

Model 1: weight, *APOE* genotype, age, HbA1c, height

Model 2: Model 1 + regular alcohol intake, current smoking, TSH, physical inactivity, homocysteine, CRP, GDS score

Model 3: Model 2 + vitamin B12, magnesium, potassium, sodium, folic acid, morbidity index

Model 4: Model 3 + HDL-C

Model 5: Model 3 + LDL-C

Model 6: Model 3 + TG

GDS = geriatric depression scale; HDL-C = high density lipoprotein cholesterol; LDL-C = low density lipoprotein cholesterol; Lp(a) = lipoprotein(a), *APOE* = apolipoprotein E; CRP = C-reactive protein; HbA1c = hemoglobin A 1c; TSH = thyroid stimulating hormone

\*= R<sup>2</sup> corrected, p-values < 0.05 = statistical significant, corrected p-value (Bonferroni) < 0.0125 = statistical significant

**Supplementary Table 5:** Association of Lp(a) levels and cognitive function – an overview of the (inconsistent) study results from the literature

| Cohort                                              | Title                                                                                                     | Study size | Age (years)                                              | Cognitive assessment                                                    | Findings                                                                                                          | Ref. |
|-----------------------------------------------------|-----------------------------------------------------------------------------------------------------------|------------|----------------------------------------------------------|-------------------------------------------------------------------------|-------------------------------------------------------------------------------------------------------------------|------|
| Italian longitudinal Study on Aging (ILSA)          | Lipoprotein (a) and cognitive performances in an elderly white population                                 | N=435      | 65-84                                                    | - MMSE<br>- Babcock Short Story<br>- Matrix Test                        | No association with cognition                                                                                     | [1]  |
| Asian (Japanese) cohort                             | Dual inverse effects of lipoprotein(a) on the dementia process in Japanese late-onset Alzheimer's disease | N=346      | 65-96                                                    | - MMSE<br>- NINCDS-ADRS<br>- NINDS-AIREN<br>- brain computed tomography | - protective of AD<br>- increased risk of VD                                                                      | [2]  |
| Asian (Japanese) cohort                             | Lipoprotein(a) phenotypes in patients with vascular dementia                                              | N=108      | VD:66 ± 12.6<br>AD:67.1 ± 13.5<br>healthy: 65.5 ± 13.3   | - DSM-IV<br>- NINCDS-ADRS                                               | - increased risk of VD                                                                                            | [3]  |
| Kuopio Ischemic Heart Disease study (KIHD; Finland) | Is lipoprotein (a) protective of dementia?                                                                | N=2,532    | 42-61                                                    | - MMSE<br>- Geriatric Mental State                                      | -protective effect on dementia in general in middle-aged men (only examined in men)                               | [4]  |
| Caucasian (Italian) cohort                          | Lipoprotein(a), apolipoprotein E genotype, and risk of Alzheimer's disease                                | N=124      | With AD:<br>71.36 (9.55)<br>without AD:<br>67.67 (10.66) | -NINCDS-ADRS                                                            | -age dependency:<br>increased risk of AD ≤ 72 years,<br>but a protective effect of AD with participants ≥72 years | [5]  |

Abbreviations

VD: vascular dementia

AD: Alzheimer's disease

MMSE = Mini Mental State Examination

Babcock Short Story = Babcock Short Story Recall Test

Matrix Test = Visual Search Matrix Test

NINCDS-ADRS = National Institute of Neurological and Communicative Disorders and Stroke and the Alzheimer's Disease and Related Disorders Association

NINDS-AIREN = National Institute of Neurologic Disorders and Stroke and Association Internationale pour la Recherche et l'Enseignement en Neurosciences

DSM-IV = Diagnostic and Statistical Manual of Mental Disorders

Geriatric Mental State



**Supplementary Table 6.** Model fit of results of PCA on eleven CERAD-Plus tests including 1, 2, 3, 4 and 5 factors

| numbers of factors | $\chi^2$ | df | p     | RMSEA | CFI   |
|--------------------|----------|----|-------|-------|-------|
| 1                  | 752.481  | 44 | <.001 | .126  | .593  |
| 2                  | 418.949  | 34 | <.001 | .106  | .779  |
| 3                  | 141.713  | 25 | <.001 | .068  | .933  |
| 4                  | 26.132   | 17 | .072  | .023  | .995  |
| 5                  | 6.809    | 10 | .7433 | <.001 | >.999 |

**Supplementary Table 7.** Model fit of results of PCA on nine CERAD-Plus tests including 1, 2, 3, and 4 factors

| numbers of factors | $\chi^2$ | df | p     | RMSEA | CFI  |
|--------------------|----------|----|-------|-------|------|
| 1                  | 689.002  | 27 | <.001 | .155  | .587 |
| 2                  | 387.682  | 19 | <.001 | .138  | .770 |
| 3                  | 107.793  | 12 | <.001 | .089  | .940 |
| 4                  | 9.176    | 6  | .164  | .023  | .998 |

## References

1. Sarti, C., et al., *Lipoprotein (a) and Cognitive Performances in an Elderly White Population: Cross-sectional and Follow-up Data*. Stroke: Journal of the American Heart Association, 2001. **32**(7): p. 1678-1683.
2. IWAMOTO, T., et al., *Dual inverse effects of lipoprotein (a) on the dementia process in Japanese late - onset Alzheimer's disease*. Psychogeriatrics, 2004. **4**(3): p. 64-71.
3. Urakami, K., et al., *Lipoprotein (a) phenotypes in patients with vascular dementia*. Dementia and geriatric cognitive disorders, 2000. **11**(3): p. 135-138.
4. Kunutsor, S.K., et al., *Is lipoprotein (a) protective of dementia?* European journal of epidemiology, 2016. **31**(11): p. 1149-1152.
5. Solfrizzi, V., et al., *Lipoprotein (a), apolipoprotein E genotype, and risk of Alzheimer's disease*. Journal of Neurology, Neurosurgery & Psychiatry, 2002. **72**(6): p. 732-736.
